# Supplementary material
Source: Springer Nature journal article supplement (https://www.springermedizin.de/resource/supplementary/13058_2013_3419_MOESM3_ESM.pdf/9704106)

**A** ALDFLUOR sorted HMECs immunostained for ER

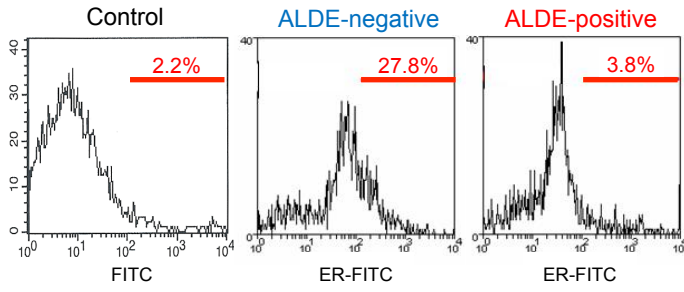

**B** Control ER+ and ER- breast cancer cell lines immunostained for ER

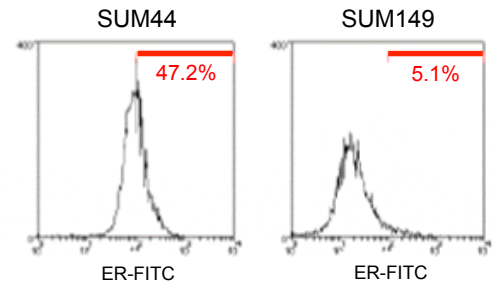

**C** ALDEFLUOR-

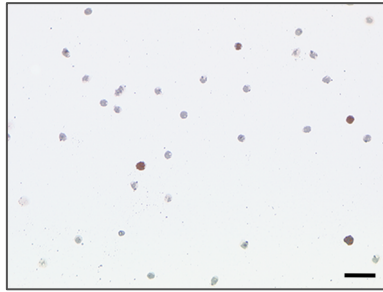

ALDEFLUOR+

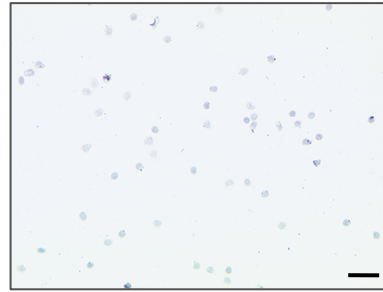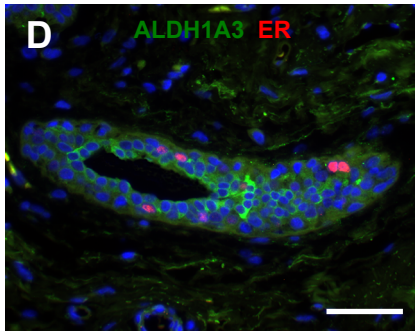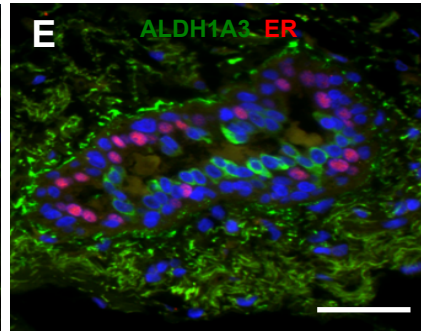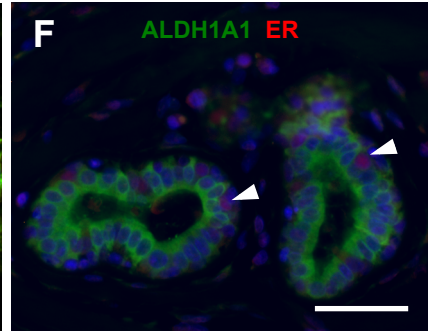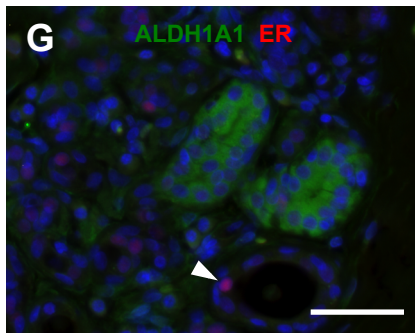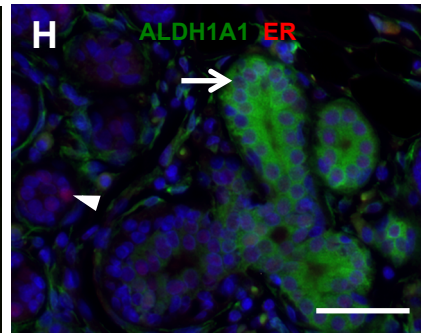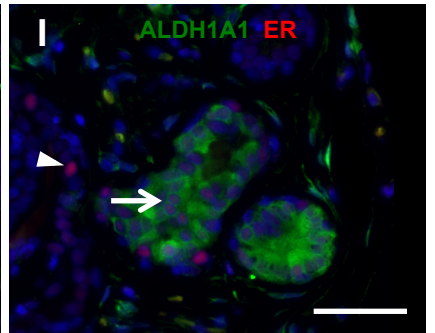

**J**

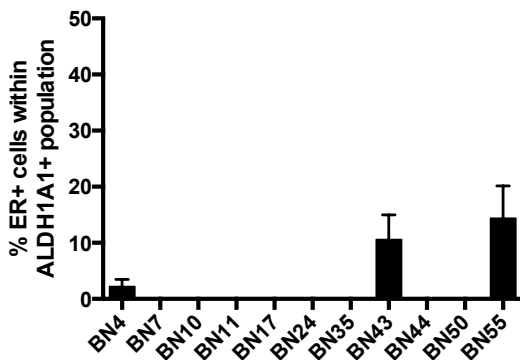

Supplement: MOESM3 [file 9704106]
